# Supplementary material
Source: PubMed Central journal article supplement (PMC3631627)
Supplement: 1216894110_pnas.201216894SI.pdf [file 1216894110_pnas.201216894SI.pdf]

# Supporting Information

Izhar et al. 10.1073/pnas.1216894110

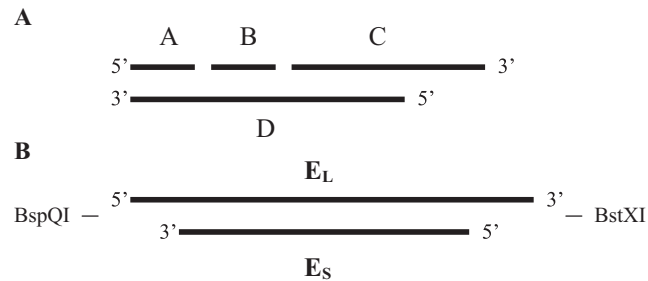

**Fig. S1.** Construction of double-stranded oligonucleotides carrying the core lesion sequence used for the construction of the lesion shuttle vectors and controls. (A) Oligonucleotide B containing a site-specific benzo[a]pyrene-guanine (BP-G) or TT 6–4 photoproduct (PP) adduct was extended by ligating oligonucleotides A and C to its 5' and 3' ends, respectively, using oligonucleotide D as a scaffold. (B) Extended oligonucleotides E<sub>L</sub> and E<sub>S</sub> were annealed to form a short DNA duplex with 5' BspQI and 3' BstXI compatible overhangs, which was then ligated to the 4,321-bp BspQI-BstXI-digested fragment of plasmid pLSV5, whose construction is described in *Materials and Methods*.

**Table S1. Tolerance efficiency and sequence signature of two-staggered BP-G adducts integrated into human chromosomes**

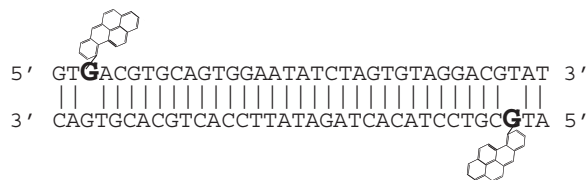

| Event type          | DNA damage tolerance product   | No. isolates | %   |
|---------------------|--------------------------------|--------------|-----|
| 1 Accurate TLS      | 5' GT <b>G</b> AC-----CGTAT 3' | 68           | 76% |
|                     | 3' CACTG-----GCATA 5'          |              |     |
|                     | 5' GTCAC-----CGCAT 3'          |              |     |
|                     | 3' CAGTG-----GC <b>G</b> TA 5' |              |     |
| 2 Mutagenic TLS     | 5' GT <b>T</b> AC-----CGTAT 3' | 6            | 6%  |
|                     | 3' CAATG-----GCATA 5'          |              |     |
|                     | 5' GT <b>A</b> AC-----CGTAT 3' |              |     |
|                     | 3' CATTG-----GCATA 5'          |              |     |
|                     | 5' GTCAC-----CGAAT 3'          |              |     |
|                     | 3' CAGTG-----GC <b>T</b> TA 5' |              |     |
| 3 HDR               | 5' GT <b>C</b> AC-----CGTAT 3' | 16           | 18% |
|                     | 3' CAGTG-----GC <b>A</b> TA 5' |              |     |
| Total no. isolates: |                                | 90           |     |

Human XP12RO xeroderma pigmentosum group A (XPA) cells were stably transformed with the lesion shuttle vector pLSV5(BP-GstaggBP-G) that carries two BP-G lesions in a staggered conformation with opposing G or T, respectively. Shown are sequences obtained from amplified genomic DNA of individual colonies after integration and long-term propagation. The nucleotides at the lesion's position are marked with boldface type. HDR, homology-dependent repair; TLS, translesion DNA synthesis.

**Table S2. Relative colony yield of cells after genomic integration of the two-staggered BP-G adducts lesion shuttle vector pLSV5(BP-GstaggBP-G)**

| Shuttle vector                 | No. colonies per dish |        |        |
|--------------------------------|-----------------------|--------|--------|
|                                | Exp. 1                | Exp. 2 | Exp. 3 |
| Control                        | 144                   | 162    | 159    |
| pLSV5(BP-GstaggBP-G)           | 120                   | 191    | 193    |
| Relative colony yield (RCY), % | 83                    | 118    | 121    |
| Average RCY, %                 | 107 ± 17              |        |        |

Relative colony yield was calculated as the ratio of the number of colonies obtained in pLSV5(BP-GstaggBP-G) to a control vector without BP-G adducts (pBCs) transfections. Shown is an average value of three independent experiments.

**Table S3. Tolerance efficiency and sequence signature of two-staggered TT 6-4 photo-products integrated into human chromosomes**

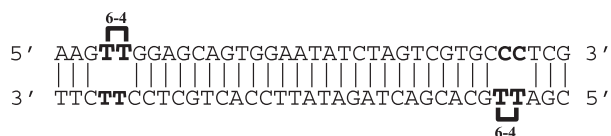

|                     | Event type    | DNA damage tolerance product                                                                                                                                                                       | No. isolates | %  |
|---------------------|---------------|----------------------------------------------------------------------------------------------------------------------------------------------------------------------------------------------------|--------------|----|
| 1                   | Accurate TLS  | 5'AAG <b>TT</b> GGGA-----TGCCCT 3'<br>3'TTCAACCT-----ACGTTA 5'<br>5'AAGAAGGA-----TGCAAT 3'<br>3'TTCTTCCT-----ACG <b>TTA</b> 5'                                                                     | 18           | 40 |
| 2                   | Mutagenic TLS | 5' <b>AATTT</b> GGGA-----TGCCCT 3'<br>3'TTAAACCT-----ACGGGA 5'<br>5' <b>AATTC</b> GGGA-----TGCCCT 3'<br>3'TTAAGCCT-----ACGGGA 5'<br>5' <b>AATTA</b> GGGA-----TGCCCT 3'<br>3'TTAATCCT-----ACGGGA 5' | 22           | 48 |
| 3                   | HDR           | 5'AAG <b>AA</b> GGGA-----TGCCCT 3'<br>3'TTCTTCCT-----ACGGGA 5'                                                                                                                                     | 5            | 11 |
| Total no. isolates: |               |                                                                                                                                                                                                    | 45           |    |

Human XP12RO XPA cells were stably transformed with pLSV56-4TTstagg that carries two 6-4TT lesions in a staggered conformation with opposing TT or CC, respectively. Shown are sequences obtained from amplified genomic DNA of individual colonies after integration and long-term propagation. The nucleotides at the lesion's position and/or neighboring bases are in boldface type.

**Table S4. Relative colony yield of cells after genomic integration of the two-staggered 6-4TT adducts lesion shuttle vector pLSV5(6-4stagg6-4)**

| Shuttle vector                 | No. colonies per dish |        |        |
|--------------------------------|-----------------------|--------|--------|
|                                | Exp. 1                | Exp. 2 | Exp. 3 |
| Control                        | 187                   | 190    | 90     |
| pLSV5(6-4Stagg6-4)             | 176                   | 184    | 96     |
| Relative colony yield (RCY), % | 94                    | 97     | 107    |
| Average RCY, %                 | 99 ± 5                |        |        |

Relative colony yield was calculated as the ratio of the number of colonies obtained with pLSV5(6-4stagg6-4) to pC6-4s (control with no lesions). Shown is an average value of three independent experiments.

**Table S5. Tolerance efficiency and sequence signature of two-staggered trimethylene lesions integrated into human chromosomes**

| Event type          | DNA damage tolerance product                                                                                                                                                                                                                 | No. isolates | Fraction, % |
|---------------------|----------------------------------------------------------------------------------------------------------------------------------------------------------------------------------------------------------------------------------------------|--------------|-------------|
| 1 HDR               | 5' ATCA <b>M</b> GTA <b>M</b> CTTGGAGGGTTGTGATCA <b>M</b> CTTCG <b>M</b> CCCTCATCTGT 3'<br>3' TAGTTCATGAACCTCCCA <b>M</b> ACTAGTGAAGCGGGAGT <b>M</b> GACA 5'<br>5'<br>5' ATCA <b>A</b> G-----CATCTGT 3'<br>3' TAGTTC-----GT <b>A</b> GACA 5' | 29           | 76%         |
| 2 TLS               | 8<br>5' ATCAAG-----CAGCTGT 3'<br>3' TAGTTC-----GT <b>C</b> GACA 5'<br>1<br>5' ATCA <b>T</b> G-----CATCTGT 3'<br>3' TAGTAC-----GTAGACA 5'                                                                                                     | 9            | 24%         |
| Total No. isolates: |                                                                                                                                                                                                                                              | 38           |             |

Human XP12RO XPA cells were stably transformed with pLSV5(M3staggM3) that carries two trimethylene (M3) lesions in staggered conformation. Shown are sequences obtained from amplified genomic DNA of individual colonies after integration and long-term propagation. The nucleotides present at the lesion's position are in boldface type.

**Table S6. Relative colony yield of cells after genomic integration of the two-staggered M3 adducts lesion shuttle vector pLSV5(M3staggM3)**

| Shuttle vector                 | No. colonies per dish |     |     |
|--------------------------------|-----------------------|-----|-----|
| Control                        | 131                   | 129 | 126 |
| pLSV5(M3staggM3seq2)           | 63                    | 77  | 44  |
| Relative colony yield (RCY), % | 48                    | 60  | 35  |
| Average RCY, %                 | 48 ± 10               |     |     |

Relative colony yield was calculated as the ratio of the number of colonies obtained with pLSV5(M3staggM3) to a control vector without M3 adducts (pCMs). Shown is an average value of five independent experiments.

**Table S7. Sequence signature of two-staggered BP-G adducts integrated into human chromosomes in cells in which expression of *REV3L*, the gene encoding the catalytic subunit of DNA polymerase zeta, was knocked down**

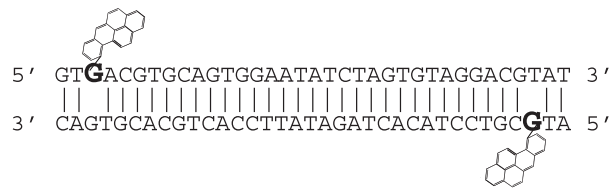

| Event type         | DNA damage tolerance product                                                                                                                                                                                                    | No. isolates (%) |                 |
|--------------------|---------------------------------------------------------------------------------------------------------------------------------------------------------------------------------------------------------------------------------|------------------|-----------------|
|                    |                                                                                                                                                                                                                                 | siControl        | si <i>REV3L</i> |
| 1. Accurate TLS    | 5'GT <b>G</b> AC-----CGTAT 3'<br>3'CACTG-----GCATA 5'<br>5'GTCAC-----CGCAT 3'<br>3'CAGTG-----GC <b>G</b> TA 5'                                                                                                                  | 27 (67.5)        | 35 (81.4)       |
| 2. Mutagenic TLS   | 5'GT <b>T</b> AC-----CGTAT 3'<br>3'CAATG-----GCATA 5'<br>5'GT <b>A</b> AC-----CGTAT 3'<br>3'CATTG-----GCATA 5'<br>5'GTCAC-----CGAAT 3'<br>3'CAGTG-----G <b>C</b> TTA 5'<br>5'GTCAC-----CGTAT 3'<br>3'CAGTG-----G <b>A</b> TA 5' | 3 (7.5) (7)      | 1 (2.3)         |
| Total no. isolates |                                                                                                                                                                                                                                 | 40               | 43              |

Human XP12RO XPA cells were treated with a control siRNA or siRNA against *REV3L* and with a boost treatment 24 h later. After 48 additional hours cells were stably transformed with pLSV5(BP-GstaggBP-G) that carries two BP-G lesions in a staggered conformation with opposing G or T, respectively. Shown are sequences obtained from amplified genomic DNA of individual colonies after integration and long-term propagation. The nucleotides at the lesion's position are marked with boldface type.

Table S8. Chromosomal DNA sequence at the integration site of the lesion shuttle vector pLSV5(BP-GstaggBP-G)

| Event no. | Chromosomal location | Chromosome:                                                                                                                       |                                                                                                                                                                            | Vector        |
|-----------|----------------------|-----------------------------------------------------------------------------------------------------------------------------------|----------------------------------------------------------------------------------------------------------------------------------------------------------------------------|---------------|
|           |                      | attR                                                                                                                              | attL                                                                                                                                                                       |               |
| 1         | 19q13.31             | CCCAATACATCAGAAAGACCCCTGGTGAC <b>CA</b> CCCGCACC<br>GGCGCTTC <b>GAG</b> ACC                                                       | <b>GACCAGATGGGTGAGGTGGAGTAC</b> CGCCCGGTCTCATTTCACTTCCCACTGT<br>GGGATCCCATAGAACTCAGG                                                                                       | <b>Vector</b> |
| 2         | 19q13.31             | CCCAATACATCAGAAAGACCCCTGGTGAC <b>CA</b> CCCGCG<br>ACC <b>CGCGCTTCGAG</b> ACCG                                                     | <b>GACCAGATGGGTGAGGTGGAGTAC</b> CGCCCGGTCTCATTTCCATTTCCACCAC<br>TGTGGATCCCATAGAACTCAGG                                                                                     | <b>Vector</b> |
| 3         | 19q13.31             | AGAATCAGACCA <b>CGGAGGGCACCGCC</b> TTGGCACC <b>CGCA</b><br>CCCGCGCTTC <b>GAG</b> ACCG                                             | <b>GACCAGATGGGTGAGGTGGAGTAC</b> CGCCCGCGGTCTCATTTCCACCAGGT<br>CCTTCTGATGGTACTGGGCACACTG                                                                                    | <b>Vector</b> |
| 4         | 19q13.31             | CCCAATACATCAGAAAGACCCCTGGTG <b>AC</b> CCCGCACCG<br>CGCGCTTC <b>GAG</b> ACC                                                        | <b>GACCAGATGGGTGAGGTGGAGTAC</b> CGCCCGCTATTTCCGTTGGTCTCATTTCTT<br>CACCACTGGGGATCCCA                                                                                        | <b>Vector</b> |
| 5         | 19q13.31             | ATCCCTGACTTCTATGGGATCC <b>AC</b> AGTGGTGAAGA<br>ATGAGACCA <b>CGAG</b> ACCG                                                        | <b>GACCAGATGGGTGAGGTGGAGTAC</b> CGCCCGCGCGGAGCCCAAGGGGTC<br>ACCAGGTCCTTCTGATGGTACTGGGGA                                                                                    | <b>Vector</b> |
| 6         | 19q13.31             | AGGTGCCAGTACCATCAGAA <b>GG</b> ACCCCTGGCGCAC<br>CGCGCTTC <b>GAG</b> ACCG                                                          | <b>GACCAGATGGGTGAGGTGGAGTAC</b> CGCCCGCGGTTCATTTCTCACCCAC<br>TGTGGATCCCATAGAACTCAGGGGA                                                                                     | <b>Vector</b> |
| 7         | 19q13.31             | TGAACATCCCTGACTTCTAT <b>GC</b> CCCTTGGCAC <b>CCCGCA</b><br>CCCGCGCTTC <b>GAG</b> ACCG                                             | <b>GACCAGATGGGTGAGGTGGAGTAC</b> CGCCCGCGGGAGCCCTTCTGTATG<br>GTACTGGGCACACCTGATCCAT                                                                                         | <b>Vector</b> |
| 8         | 19q13.31             | ATCCCTGACTTCTATGGGATCC <b>AC</b> AGTGGTGAAG<br>AATGAGACCA <b>CGAG</b> ACCG                                                        | <b>GACCAGATGGGTGAGGTGGAGTAC</b> CGCCCGCGGGAGCCCAAGG<br>GGTACCACCGGTCCTTGTGATGGTACTGGGCACACCTGATCC                                                                          | <b>Vector</b> |
| 9         | 19q13.31             | ATCCCTGACTTCTATGGGATCC <b>AC</b> AGTGGTGAAG<br>AATGAGACCA <b>CGAG</b> ACCG                                                        | <b>GACCAGATGGGTGAGGTGGAGTAC</b> CGCCCGCGGGAGCGGT<br>CACCAGGTCCTTCTGATGGTACTGGGCACACCTGATCC                                                                                 | <b>Vector</b> |
| 10        | 19q13.31             | ATGAGACCA <b>CGGA</b> TACCA <b>GG</b> AC <b>CC</b> TGGCAC <b>CC</b><br>GCACC <b>GGCTTCG</b> AGACCG                                | <b>GACCAGATGGGTGAGGTGGAGTAC</b> CGCCCGCGGGTACCAGGGTCCTTC<br>TGATGGTACTGGGGA                                                                                                | <b>Vector</b> |
| 11        | 19q13.31             | GTTGAAGAATGAGACCA <b>CGAG</b> ACCG<br>TCTTGAACA <b>TCC</b> CTGACTTCTATGGGATCC <b>AC</b> ACAGT                                     | <b>GACCAGATGGGTGAGGTGGAGTAC</b> CGCCCGCGGGAGCCCA<br>GGGTCACACCGGTCCTTGTGATGGTACTGGGCACACCTGATCC                                                                            | <b>Vector</b> |
| 12        | 2p11.1               | TTTGAACA <b>CT</b> TTTTTTGTAGTATAT <b>GG</b> AGTGG <b>A</b><br>CAAT <b>TCG</b> AGACCG                                             | <b>GACCAGATGGGTGAGGTGGAGTAC</b> CGCCCGCGGGAGCGGT<br>GACGAAGCACTTCTGAAAGCTTCAATGGGATGTTTCATTTGAAGTCACA                                                                      | <b>Vector</b> |
| 13        | 2q23.2               | AAGACATAGGACCA <b>TGA</b> AGAT <b>CC</b> AGGG <b>AC</b> CG <b>CC</b> CTG<br>GCACC <b>GC</b> ACC <b>GGCTTCG</b> AG <b>CC</b> G     | <b>GACCAGATGGGTGAGGTGGAGTAC</b> CGCCCGCGGGAGCGGT<br>ACTAAAGAA <b>CT</b> ATCA                                                                                               | <b>Vector</b> |
| 14        | 6P21.1               | ATATATAGTTC <b>CA</b> TGG <b>AC</b> CC <b>CG</b> CC <b>CG</b> AC <b>CC</b><br>GGCTTC <b>GAG</b> ACCG                              | <b>GACCAGATGGGTGAGGTGGAGTAC</b> CGCCCGCGGGAGCG<br>CCATGGCCATTTGTTCTGTAATAATGCATATATAAA                                                                                     | <b>Vector</b> |
| 15        | 9p13.2               | TTGGATATAGTTC <b>CA</b> TGG <b>AC</b> CC <b>CG</b> AC <b>CC</b><br>CCGGCTTC <b>GAG</b> ACCG                                       | <b>GACCAGATGGGTGAGGTGGAGTAC</b> CGCCCGCGGGAGCGGT <b>CA</b><br>ATTCCATCATTGAACAGATGGGAGGCTGAGACT                                                                            | <b>Vector</b> |
| 16        | 9p21.2               | AACATCATCAGATAAAATAA <b>TAA</b> GTCAA <b>AG</b> TAC<br>CTGAAAT <b>TA</b> CC <b>GC</b> AC <b>CC</b> NG <b>GTTCG</b> AG <b>ACCG</b> | <b>GACCAGATGGGTGAGGTGGAGTAC</b> CGCCCGCGGGTAAAGAA <b>CT</b> AG <b>AG</b><br>ACCC <b>TT</b> AA <b>CA</b> TTTT <b>CC</b> AGGG <b>CA</b> ATACACATGGTAAA                       | <b>Vector</b> |
| 17        | 8p22                 | TACAGCAATAAGTACTTGGGTT <b>CC</b> TGGCAC <b>CCCG</b> AC<br>CGCGCTTC <b>GAG</b> ACCG                                                | <b>TGGCAGACTTGGGTCTGAACAGATATTTCTGGTTC<b>CA</b>TGCTT<b>CA</b>TGCTT<b>CA</b></b><br>TGCCAGACTTGGGTCTGAACAGATATTTCTGGTTC <b>CA</b> TGCTT <b>CA</b>                           | <b>Vector</b> |
| 18        | 8p22                 | AACCGGGCAGAGTTTTAGAAA <b>TGG</b> TAT <b>CC</b> CGCAC<br>CGCGCTTC <b>GAG</b> ACCG                                                  | <b>GACCAGATGGGTGAGGTGGAGTAC</b> CGCCCGCGGGAGCGGT <b>CA</b> CC <b>CA</b><br>AGTCTCCTCTACTAGACTCC <b>CC</b> CC                                                               | <b>Vector</b> |
| 19        | 8p22                 | CATTGGTCA <b>TGG</b> CTTAA <b>AT</b> CT <b>CA</b> TTGG <b>CA</b> CC <b>CG</b> CA<br>CCGGCTTC <b>GAG</b> ACCG                      | <b>GACCAGATGGGTGAGGTGGAGTAC</b> CGCCCGCGGGAGCGGT <b>CA</b> AG <b>TA</b><br>CTTATTGCTGATTTGA <b>AA</b> CC <b>AC</b> CC                                                      | <b>Vector</b> |
| 20        | 5q14.3               | GGTAAATAGTTTTTCTGGTGG <b>CA</b> T <b>GG</b> CAC <b>CCCG</b> AC<br>CGCGCTTC <b>GAG</b> ACCG                                        | <b>GACCAGATGGGTGAGGTGGAGTAC</b> CGCCCGCGCGGCTTCCAGGCT <b>AG</b><br>TGAAAATTAAGGCG <b>CT</b> AC <b>CT</b> TAT                                                               | <b>Vector</b> |
| 21        | 4q35.2               | GGTTAGGTTAGGTTAGGTTAGGTTAGGTTAGGTT<br>GAGGT <b>AC</b> CC <b>GC</b> AC <b>CC</b> GG <b>CTTCG</b> AG <b>ACCG</b>                    | <b>GACCAGATGGGTGAGGTGGAGTAC</b> CGCCCGCGGGAGCGGT <b>CA</b> AG <b>TA</b><br>TGAGGTTAGGTTAGGTTAGGTTAGGTTAGGTTAGGTTAGGTTA                                                     | <b>Vector</b> |
| 22        | 4q35.1               | CTCTGACCC <b>CA</b> AGTAGC <b>AT</b> CTAGG <b>AT</b> GG <b>CA</b> CC <b>CG</b> AC <b>C</b><br>CGCGCTTC <b>GAG</b> ACCG            | <b>GACCAGATGGGTGAGGTGGAGTAC</b> CGCCCGCGGGAGCGGT <b>CA</b> AG <b>TA</b><br>AGTGGCATA <b>TA</b> TACAGTGCCTT <b>TT</b> AGCT <b>CT</b> GC <b>CA</b> TT <b>CG</b> CA <b>GA</b> | <b>Vector</b> |

Table S8. Cont.

| Event no. | Chromosomal location | Chromosome:                                                                                  |                                                                                                                                                                                                                                                                      |
|-----------|----------------------|----------------------------------------------------------------------------------------------|----------------------------------------------------------------------------------------------------------------------------------------------------------------------------------------------------------------------------------------------------------------------|
|           |                      | attR                                                                                         | attL                                                                                                                                                                                                                                                                 |
| 23        | 7p14.1               | CTGAAAAACCCCTAAAGTATTCTTAGAGGGCA<br><b>CGCCCTGGCA</b> <b>CCCGCA</b> <b>CCGGGGCTTCGAGACCG</b> | <b>GACCAGATGGGTGAGGTGGAGTACGCCGCCGGGGAGCT</b><br>AAACTGTCTTCCATTTTCAGTTTTGAATCAGTATTTTACACTCAAACC<br><b>GACCAGATGGGTGAGGTGGAGTACGCCGCCACTCCA</b><br>ATTGCAGCTGCTTACCAGATGTGGTTTCATTGCCTCA<br><b>GACCAGATGGGTGAGGTGGAGTACGCCGCCAGGATCCCCATGGGGG</b><br>GGGGCTCACTGACT |
| 24        | 10q22.1              | TCTTGGAGAACGCCATGGATTCTCATAGCG<br><b>CCCTGGCACCCGCA</b> <b>CCGGCTTCGAGACCG</b>               | <b>GACCAGATGGGTGAGGTGGAGTACGCCGCCGGGGAG</b><br>GCCCCTATGGCATTATTTAAACAATAATTTCTCTC<br><b>GACCAGATGGGTGAGGTGGAGTACGCCGCCGGGGAG</b><br>GCCCGAGGAAAATGATCATTTTTAGTTTCATAATTTCAACAAG                                                                                     |
| 25        | 20p13                | GGAAAGCAGACAGACCAATGGGTGGCCCGCGCA<br><b>CCGGGGCTTCGAGACCG</b>                                | <b>GACCAGATGGGTGAGGTGGAGTACGCCGCCGGGGAG</b><br>GCCCCTATGGCATTATTTAAACAATAATTTCTCTC<br><b>GACCAGATGGGTGAGGTGGAGTACGCCGCCGGGGAG</b><br>GCCCGAGGAAAATGATCATTTTTAGTTTCATAATTTCAACAAG                                                                                     |
| 26        | 3p23                 | GTCTGTCCAAAAGATCCAGTAAACATCCACCT<br>CTATTTCTTT <b>CGGCCTTCGAGACCG</b>                        | <b>GACCAGATGGGTGAGGTGGAGTACGCCGCCGGGGAG</b><br>GCCCCTATGGCATTATTTAAACAATAATTTCTCTC<br><b>GACCAGATGGGTGAGGTGGAGTACGCCGCCGGGGAG</b><br>GCCCGAGGAAAATGATCATTTTTAGTTTCATAATTTCAACAAG                                                                                     |
| 27        | 1q41                 | TGTATGTTTATAAATTTATTTTTTAAATCC<br>TCATTTTTTAACCAATCC <b>GGGCTTCGAGACCG</b>                   | <b>GACCAGATGGGTGAGGTGGAGTACGCCGCCGGGGAG</b><br>GCCCCTATGGCATTATTTAAACAATAATTTCTCTC<br><b>GACCAGATGGGTGAGGTGGAGTACGCCGCCGGGGAG</b><br>GCCCGAGGAAAATGATCATTTTTAGTTTCATAATTTCAACAAG                                                                                     |
| 28        | 13q13.3              | AAGTCAAGT AATGGTTAAA GGCTTTGAAG AG<br>TATCTTTGCG                                             | <b>GACCAGATGGGTGAGGTGGAGTACGCCGCCGGGGAG</b><br>GCCCCTATGGCATTATTTAAACAATAATTTCTCTC<br><b>GACCAGATGGGTGAGGTGGAGTACGCCGCCGGGGAG</b><br>GCCCGAGGAAAATGATCATTTTTAGTTTCATAATTTCAACAAG                                                                                     |
| 29        | 4p13                 | TACACATCCTGGACCATGAA GAAAGGTAGAC CTGC<br><b>AGATCTGNATCTCATACAGACTTAT*</b>                   | <b>GACCAGATGGGTGAGGTGGAGTACGCCGCCGGGGAG</b><br>GCCCCTATGGCATTATTTAAACAATAATTTCTCTC<br><b>GACCAGATGGGTGAGGTGGAGTACGCCGCCGGGGAG</b><br>GCCCGAGGAAAATGATCATTTTTAGTTTCATAATTTCAACAAG                                                                                     |
| 30        | 12q22                | CCAGACGGTCCGGGGCCCGCTC <b>GCACCCCGCGAC</b><br><b>GCCCTCGCACCTCCCGTCTCAC*</b>                 | <b>GACCAGATGGGTGAGGTGGAGTACGCCGCCGGGGAG</b><br>GCCCCTATGGCATTATTTAAACAATAATTTCTCTC<br><b>GACCAGATGGGTGAGGTGGAGTACGCCGCCGGGGAG</b><br>GCCCGAGGAAAATGATCATTTTTAGTTTCATAATTTCAACAAG                                                                                     |
| 31        | Xq22.3               | CCAGTTTCTTCAACAAAAAATTGCAAAAATAAAAAAG<br>GAACAAGG <b>AGACTTATAGATTCCC*</b>                   | <b>GACCAGATGGGTGAGGTGGAGTACGCCGCCGGGGAG</b><br>GCCCCTATGGCATTATTTAAACAATAATTTCTCTC<br><b>GACCAGATGGGTGAGGTGGAGTACGCCGCCGGGGAG</b><br>GCCCGAGGAAAATGATCATTTTTAGTTTCATAATTTCAACAAG                                                                                     |

Human XP12RO XPA cells were stably transformed with pLSV5(BP-GstaggBP-G) that carries two BP-G lesions in a staggered conformation. Individual colonies carrying the integrated plasmid were propagated for 21 d, after which the integrated plasmids were rescued and subjected to DNA sequence analysis of the vector-chromosome junctions. attR and attL are pseudo att sites, which are hallmarks of  $\phi$ C31 integrase-mediated integration. Several random integrations were detected too (marked by asterisks). The authentic attP site is 5'-GCCCAACTGGGGTAACC TTGATTCTCTCAGTTGGGG-3' (the attL and attR sites are underlined).

\*Random integration.

**Table S9. Signature of chromosomal DNA damage tolerance of a single TT 6–4 PP**  
**5' CAAGTTGGAGC**  
**3' GTTCTTCTCG**

| No.                 | Event type      | DNA damage tolerant product                | No. isolates | Fraction, % |
|---------------------|-----------------|--------------------------------------------|--------------|-------------|
| 1                   | Accurate TLS    | 5' CAAG <u>TT</u> GGAGC<br>3' GTTCAACCTCG  | 13           | 12          |
| 2                   | Mutagenic TLS   | 5' CAA <u>TT</u> GGAGC<br>3' GTTAAACCTCG   | 40           | 38          |
|                     |                 | 5' CAA <u>T</u> GGAGC<br>3' GTTAAACCTCG    | 19           |             |
|                     |                 | 5' CAA <u>T</u> CGGAG<br>3' GTTAAACCTCG    | 4            |             |
|                     |                 | 5' CAA <u>T</u> AGGAGC<br>3' GTTAAACCTCG   | 3            |             |
|                     |                 | 5' CAAG <u>C</u> GGAGC<br>3' GTTCAACCTCG   | 3            |             |
|                     |                 | 5' CAAG <u>T</u> GGAGC<br>3' GTTCAACCTCG   | 2            |             |
|                     |                 | 5' CAA <u>C</u> GGAGC<br>3' GTTCAACCTCG    | 2            |             |
|                     |                 | 5' CAAG <u>T</u> GGAGC<br>3' GTTCAACCTCG   | 1            |             |
|                     |                 | 5' CAA <u>AAA</u> GGAGC<br>3' GTTCAACCTCG  | 1            |             |
|                     |                 | 5' CAA <u>AAAA</u> GGAGC<br>3' GTTCAACCTCG | 1            |             |
|                     |                 | 5' CAAG <u>G</u> GGAGC<br>3' GTTCAACCTCG   | 1            |             |
|                     |                 | 5' CAA <u>TT</u> GGAAAGC<br>3' GTTAAACCTCG | 1            |             |
|                     |                 | 5' CA <u>G</u> TTGGAGC<br>3' GTCAACCTCG    | 1            |             |
|                     |                 | 5' CAA <u>TTA</u> GGAGC<br>3' GTTAAACCTCG  | 1            |             |
| 3                   | Replication/HDR | 5' CAAGAAGGAGC<br>3' GTTCTTCTCG            | 53           | 50          |
| Total no. isolates: |                 |                                            | 106          | 100         |

Human XP12RO XPA cells were stably transformed with pLSV5(TT6-4) that carries a single TT 6–4 PP lesion with opposing TT. Shown are sequences obtained from amplified genomic DNA of individual colonies after integration and long-term propagation. The nucleotides at the location of the original lesion are underlined. The mutations are in boldface type and italics.

**Table S10. Oligonucleotides used for construction of pLSV5(BP-GstaggBP-G), pLSV5(BP-G), and pLSV5BCs vectors**

|                 | Sequence                                                                            | bp |
|-----------------|-------------------------------------------------------------------------------------|----|
| <b>Long</b>     |                                                                                     |    |
| 1A <sub>L</sub> | GCTCGATCTGAC                                                                        | 12 |
| 1B <sub>L</sub> | GTTTCGT ( <u>G</u> ) ACGTG                                                          | 12 |
| 1C <sub>L</sub> | CAGTGGAAATATCTAGTGTAGGACGTATGCTCCTTGAACGCACCG                                       | 44 |
| 1D <sub>L</sub> | CGTCCTACACTAGATATCCACTGCACGTACGGAACGTGATCGAG                                        | 47 |
| 1E <sub>L</sub> | GCTCGATCTGACGTTTCGT ( <u>G</u> ) ACGTGCAGTGGAAATATCTAGTGTAGGACGTATGCTCCTTGAACGCACCG | 68 |
| 1F <sub>L</sub> | GCTCGATCTGACGTTTCGTGACGTGCAGTGGAAATATCTAGTGTAGGACGTATGCTCCTTGAACGCACCG              | 68 |
| <b>Short</b>    |                                                                                     |    |
| 1A <sub>S</sub> | GCGTTCAAGGAG                                                                        | 12 |
| 1B <sub>S</sub> | CAT ( <u>G</u> ) CGTCCTAC                                                           | 12 |
| 1C <sub>S</sub> | ACTAGATATCCACTGCACGTGACGAACGTGATCG                                                  | 37 |
| 1D <sub>S</sub> | CACGTGCAGTGGAAATATCTAGTGTAGGACGTATGCTCCTTGAACG                                      | 45 |
| 1E <sub>S</sub> | GCGTTCAAGGAGCAT ( <u>G</u> ) CGTCCTACACTAGATATCCACTGCACGTGACGAACGTGATCG             | 61 |
| 1F <sub>S</sub> | GCGTTCAAGGAGCATGCGTCCTACACTAGATATCCACTGCACGTGACGAACGTGATCG                          | 61 |

Shown are the oligonucleotides used to construct the duplex oligonucleotides carrying the core lesion sequences for building the lesion shuttle vectors carrying BP-G lesions and their controls. The underlined G represents the BP-G adduct. The outline of the construction is shown in Fig. S1 and described in *Materials and Methods*.

**Table S11. Oligonucleotides used for construction of pLSV5(TT6-4staggTT6-4) and pV5TTCs vectors**

|                 | Sequence                                                                           | bp |
|-----------------|------------------------------------------------------------------------------------|----|
| <b>Long</b>     |                                                                                    |    |
| 2A <sub>L</sub> | GCTCGATCTGAC                                                                       | 12 |
| 2B <sub>L</sub> | GCAAG ( <u>TT</u> ) GGAG                                                           | 11 |
| 2C <sub>L</sub> | CAGTGGAAATATCTAGTGTGCGCCCTCGCACTCCTTGAACGCACCG                                     | 44 |
| 2D <sub>L</sub> | GCGAGGGCAGCACTAGATATCCACTGCTCCAACTGCGTCAGATCGAGC                                   | 50 |
| 2E <sub>L</sub> | GCTCGATCTGACGCAAG ( <u>TT</u> ) GGAGCAGTGGAAATATCTAGTGTGCGCCCTCGCACTCCTTGAACGCACCG | 67 |
| 2F <sub>L</sub> | GCTCGATCTGACGCAAGTGGAGCAGTGGAAATATCTAGTGTGCGCCCTCGCACTCCTTGAACGCACCG               | 67 |
| <b>Short</b>    |                                                                                    |    |
| 2A <sub>S</sub> | GCGTTCAAGGAG                                                                       | 12 |
| 2B <sub>S</sub> | TGCGA ( <u>TT</u> ) GCACG                                                          | 12 |
| 2C <sub>S</sub> | ACTAGATATCCACTGCTCCTTCTTGCCTGATCG                                                  | 36 |
| 2D <sub>S</sub> | GAAGGAGCAGTGGAAATATCTAGTGTGCAATCGCACTCCTTGAACG                                     | 49 |
| 2E <sub>S</sub> | GCGTTCAAGGAGTGCGA ( <u>TT</u> ) GCACACTAGATATCCACTGCTCCTTCTTGCCTGATCG              | 60 |
| 2F <sub>S</sub> | GCGTTCAAGGAGTGCGATTGCACACTAGATATCCACTGCTCCTTCTTGCCTGATCG                           | 60 |

Shown are the oligonucleotides used to construct the duplex oligonucleotides carrying the core lesion sequences for building the lesion shuttle vector carrying TT 6–4 PP lesions and their controls. The underlined TT represents the 6–4 PP. The outline of the construction is shown in Fig. S1 and described in *Materials and Methods*.

**Table S12. Oligonucleotides used for construction of pLSV5(M3staggM3), pLSV5(M3oppM3), and pV5MCs vectors**

|              | Sequence                                                           | bp |
|--------------|--------------------------------------------------------------------|----|
| <b>Long</b>  |                                                                    |    |
| 3E1          | GCTGCTCTCCATCAAMTACTTGGAGGGTTGTGATCACTTCGCCCTCAGCTGTGTTGTGGCGGACCG | 66 |
| 3E2          | GCTGCTCTCCATCAMGTACTTGGAGGGTTGTGATCACTTCGCCCTCATCTGTGTTGTGGCGGACCG | 66 |
| 3F           | GCTGCTCTCCATCAAGTACTTGGAGGGTTGTGATCACTTCGCCCTCAGCTGTGTTGTGGCGGACCG | 66 |
| <b>Short</b> |                                                                    |    |
| 3E           | CCGCCACAACACAGMTGAGGGCGAAGTATCACAACCCCTCCAAGTACTTGTGGAGAGC         | 59 |
| 3F           | CCGCCACAACACAGCTGAGGGCGAAGTATCACAACCCCTCCAAGTACTTGTGGAGAGC         | 59 |

Shown are the oligonucleotides used to construct the duplex oligonucleotides carrying the core lesion sequences for building the lesion shuttle vectors carrying M3 lesions and their controls. The underlined M represents the M3 lesion. The outline of the construction is shown in Fig. S1 and described in *Materials and Methods*.
